# Supplementary material
Source: PubMed Central journal article supplement (PMC2797153)

Supplement figure

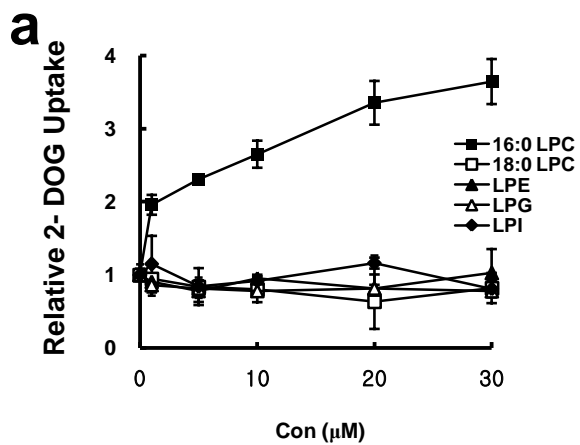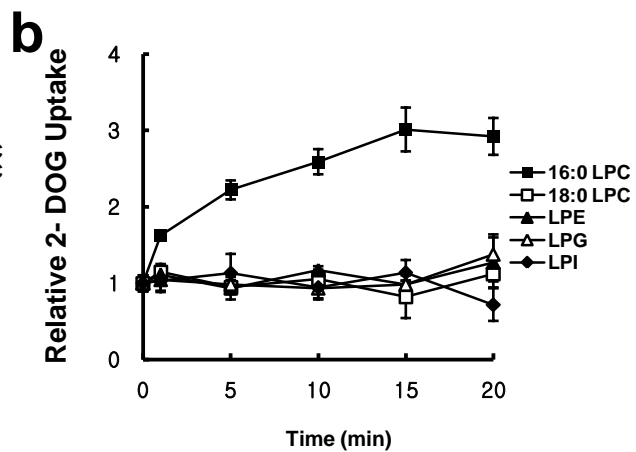

Supplement: supp_M109.024869_jbc.M109.024869-1.pdf [file supp_M109.024869_jbc.M109.024869-1.pdf]
